# Supplementary material for: Ni stabilized rock-salt structured CoO; Co1−xNixO: tuning of eg electrons to develop a novel OER catalyst
Source: Royal Society of Chemistry journal article supplement (doi:10.1039/d0ra03050c), 2020-01-01
Supplement: d0ra03050c1.pdf [file d0ra03050c1.pdf]

Supplementary Information:

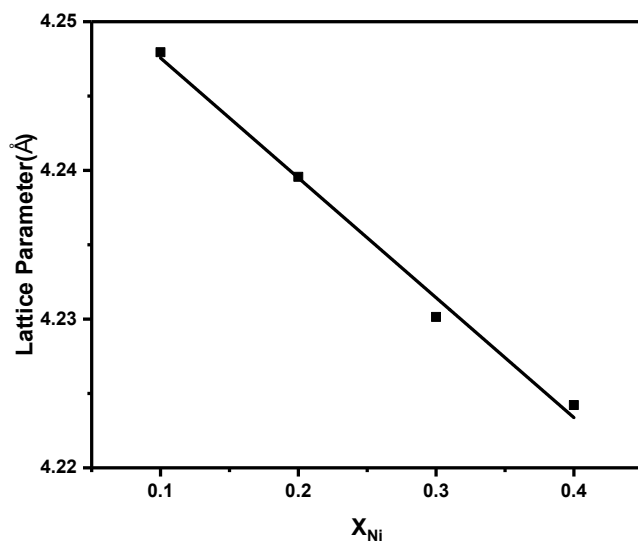

Figure S1 : Variation of the lattice parameter of Ni<sub>x</sub>Co<sub>1-x</sub>O with Ni content
